# Supplementary material for: Control of wind speed and contact angle on submicron particulate matter sampling
Source: PeerJ. 2025 Nov 4;13:e20235. doi: 10.7717/peerj.20235 (PMC12593726; doi:10.7717/peerj.20235)
Supplement: Supplemental Information 2 — U0 stands for wind speed, θ is the contact angle, Ci and Ce are the incoming and exiting mass concentrations, respectively, and η stands for sampling efficiency. [file peerj-13-20235-s002.xlsx]

## Sheet: Sheet1
θ (°)	U0 (m/s)	0.880855	1.34098	1.52309	1.78078	1.96249	2.26859	2.46448	2.68521	2.9289	3.13754	3.33293	4.05809	4.09638
0°	Ci (mg/m^3)	0.33432	0.337589	0.349114	0.39348	0.418349	0.439517	0.457114	0.483412	0.481548	0.484687	0.453491	0.418145	0.42532
	Ce (mg/m^3)	0.336984	0.340351	0.359631	0.410282	0.432602	0.454073	0.47321	0.500066	0.500127	0.499475	0.472818	0.436611	0.444248
	η(%)	99.2095	99.1885	97.0757	95.9047	96.7051	96.7945	96.5986	96.6696	96.285	97.0394	95.9124	95.7705	95.7395
θ (°)	U0 (m/s)	1.04433	1.4445	1.64315	1.94579	2.23812	2.49506	2.71503	2.94756	3.10687	3.37659	4.09414	4.10424
0°	Ci (mg/m^3)	0.514632	0.540315	0.535507	0.5228	0.500157	0.472408	0.446419	0.421924	0.423769	0.426386	0.40547	0.388791
	Ce (mg/m^3)	0.522311	0.546393	0.545537	0.534469	0.511028	0.483113	0.460812	0.436706	0.439793	0.442621	0.410648	0.401933
	η(%)	98.5299	98.8876	98.1613	97.8167	97.8727	97.7841	96.8765	96.6151	96.3564	96.3321	98.739	96.7301
θ (°)	U0 (m/s)	0.930369	1.44165	1.69307	1.98745	2.25188	2.52007	2.90088	3.34804	3.90722	4.03704
45°	Ci (mg/m^3)	0.433384	0.205178	0.143183	0.12121	0.114025	0.10943	0.100829	0.117727	0.112831	0.100348
	Ce (mg/m^3)	0.459039	0.221192	0.155146	0.131755	0.123477	0.119037	0.112	0.127138	0.123591	0.110309
	η(%)	94.4111	92.7602	92.2887	91.9962	92.3449	91.9295	90.0262	92.5975	91.2932	90.9703
θ (°)	U0 (m/s)	1.14738	1.54419	1.73403	1.91725	2.26069	2.46209	2.73581	2.87537	3.13908	3.39163	4.03699	4.05388
45°	Ci (mg/m^3)	0.0992866	0.0990071	0.0962538	0.10022	0.0998144	0.0998539	0.10375	0.108777	0.115222	0.121161	0.12112	0.116742
	Ce (mg/m^3)	0.107057	0.104874	0.105005	0.107244	0.106448	0.107007	0.109	0.116566	0.125791	0.129054	0.130298	0.129823
	η(%)	92.742	94.4059	91.6656	93.4505	93.7683	93.3154	95.1839	93.3175	91.5983	93.8844	92.9561	89.9243
θ (°)	U0 (m/s)	1.14145	1.48599	1.72912	1.9764	2.17284	2.44437	2.68248	2.8543	3.10446	3.31364	3.87978	4.00875
45°	Ci (mg/m^3)	0.168277	0.148964	0.132147	0.12239	0.113771	0.117625	0.122959	0.128803	0.103355	0.0927822	0.0841691	0.0752246
	Ce (mg/m^3)	0.175675	0.154752	0.139695	0.131879	0.120684	0.123594	0.131273	0.13393	0.111839	0.0999854	0.0929661	0.0848303
	η(%)	95.7886	96.2597	94.5964	92.805	94.2715	95.1709	93.6663	96.1717	92.4136	92.7957	90.5374	88.6766
θ (°)	U0 (m/s)	0.599702	1.21971	1.52657	1.7971	2.46325	2.63837	2.90282	3.11127	3.37895	3.91307	4.05981
90°	Ci (mg/m^3)	0.881496	0.866553	0.837777	0.826764	0.794529	0.814514	0.801275	0.807467	0.792139	0.790934	0.756618
	Ce (mg/m^3)	0.922993	0.898952	0.878983	0.869224	0.834757	0.856936	0.851694	0.851837	0.833111	0.84278	0.805926
	η(%)	95.5041	96.3959	95.3121	95.1152	95.1808	95.0495	94.0801	94.7913	95.0821	93.8482	93.8818
θ (°)	U0 (m/s)	0.83968	1.27134	1.52008	1.70278	1.88937	2.20601	2.5387	2.65865	2.89816	3.10456	3.35031	3.9986	4.00542
90°	Ci (mg/m^3)	0.769316	0.661026	0.593666	0.517522	0.471698	0.451552	0.421369	0.397568	0.343912	0.316385	0.298521	0.27927	0.283966
	Ce (mg/m^3)	0.81379	0.704152	0.629504	0.556664	0.504054	0.48251	0.450823	0.421266	0.369447	0.339329	0.325501	0.30606	0.307443
	η(%)	94.535	93.8755	94.307	92.9685	93.5809	93.5839	93.4667	94.3747	93.0883	93.2384	91.7112	91.2468	92.3637
θ (°)	U0 (m/s)	1.14145	1.48599	1.72912	1.9764	2.17284	2.44437	2.68248	2.8543	3.10446	3.31364	3.87978	4.00875
135°	Ci (mg/m^3)	0.74853	0.717757	0.691359	0.675326	0.64312	0.616187	0.581183	0.547248	0.542865	0.529272	0.516093	0.51922
	Ce (mg/m^3)	0.762409	0.735503	0.711658	0.688359	0.662598	0.630935	0.604443	0.56959	0.562228	0.549524	0.530979	0.538428
	η(%)	98.1797	97.5873	97.1476	98.1067	97.0604	97.6626	96.1519	96.0776	96.556	96.3146	97.1965	96.4327
θ (°)	U0 (m/s)	0.556008	0.945283	1.16887	1.52823	1.71613	2.34375	2.54999	2.7609	3.02906	3.3241	3.93268	3.9663
135°	Ci (mg/m^3)	0.650839	0.618452	0.60461	0.586251	0.575436	0.539528	0.542445	0.520519	0.488367	0.477706	0.458938	0.488429
	Ce (mg/m^3)	0.663678	0.627331	0.618673	0.597899	0.591302	0.550571	0.554315	0.539506	0.505708	0.489405	0.486367	0.504204
	η(%)	98.0655	98.5845	97.7269	98.0518	97.3167	97.9943	97.8586	96.4807	96.571	97.6096	94.3604	96.8713
θ (°)	U0 (m/s)	0.985	1.32106	1.61991	1.82738	2.06523	2.29033	2.558	2.78798	3.05384	3.28512	3.74335	3.88987
135°	Ci (mg/m^3)	0.733144	0.741064	0.720679	0.693827	0.674489	0.648252	0.624056	0.603905	0.567983	0.54718	0.507659	0.488154
	Ce (mg/m^3)	0.749503	0.754272	0.737627	0.714827	0.698344	0.671907	0.644405	0.627528	0.591274	0.569401	0.531988	0.509434
	η(%)	97.8172	98.2489	97.7024	97.0622	96.5841	96.4795	96.8422	96.2354	96.0608	96.0973	95.4267	95.8229
θ (°)	U0 (m/s)	1.02725	1.33569	1.7156	1.93767	2.16247	2.42873	2.67769	2.95525	3.20329	3.44563	4.1123	4.12023
180°	Ci (mg/m^3)	0.301924	0.283759	0.257657	0.24841	0.221614	0.199094	0.19304	0.191823	0.191234	0.174112	0.16757	0.161936
	Ce (mg/m^3)	0.319324	0.300591	0.27223	0.260286	0.232836	0.206226	0.201059	0.19724	0.200915	0.182482	0.177775	0.171571
	η(%)	94.5512	94.4004	94.6468	95.4376	95.1801	96.5416	96.0117	97.2535	95.1816	95.4134	94.2594	94.3847
θ (°)	U0 (m/s)	0.504627	0.869615	1.35735	1.6427	1.79362	2.10615	2.37833	2.64169	2.88657	3.07792	3.27352	4.03581	4.04961
180°	Ci (mg/m^3)	0.500256	0.468623	0.401082	0.745069	0.703438	0.679112	0.618863	0.588694	0.539832	0.509613	0.471726	0.400912	0.431967
	Ce (mg/m^3)	0.518017	0.479979	0.413217	0.792591	0.743937	0.715259	0.654368	0.619233	0.578914	0.53707	0.50202	0.424356	0.455817
	η(%)	96.5714	97.6341	97.0633	94.0042	94.5561	94.9462	94.5743	95.0682	93.249	94.8876	93.9656	94.4754	94.7676

## Sheet: Sheet2
1.63366	1.65173	1.79826	1.78899	2.11041	2.10189	2.39657	2.36008	2.64382	2.63955	2.89019	2.88295	3.08603	3.06981	3.27928	3.26775	4.04309	4.03115	4.05614	4.04046	1.34643	1.36827	0.89299	0.846241	0.466562	0.542692
0.754131	0.736007	0.709314	0.697562	0.685945	0.672278	0.627489	0.610238	0.59559	0.581797	0.550798	0.528866	0.517681	0.501546	0.472079	0.471373	0.452861	0.424935	0.411074	0.376889	0.392131	0.410033	0.454538	0.482708	0.494231	0.506281
0.805545	0.779638	0.748724	0.739151	0.72979	0.700728	0.660307	0.648428	0.628525	0.609941	0.584362	0.573467	0.550337	0.523804	0.506123	0.497918	0.479631	0.452243	0.432004	0.396469	0.402488	0.423946	0.463723	0.496235	0.513551	0.522483
93.6175	94.4038	94.7363	94.3735	93.9921	95.94	95.0299	94.1104	94.76	95.3858	94.2563	92.2226	94.0662	95.7506	93.2737	94.6688	94.4186	93.9617	95.1552	95.0613	97.4268	96.7183	98.0193	97.2741	96.238	96.899
0.466562	0.494231	0.513551	96.238
0.542692	0.506281	0.522483	96.899
0.846241	0.482708	0.496235	97.2741
0.89299	0.454538	0.463723	98.0193
1.34643	0.392131	0.402488	97.4268
1.36827	0.410033	0.423946	96.7183
1.63366	0.754131	0.805545	93.6175
1.65173	0.736007	0.779638	94.4038
1.78899	0.697562	0.739151	94.3735
1.79826	0.709314	0.748724	94.7363
2.10189	0.672278	0.700728	95.94
2.11041	0.685945	0.72979	93.9921
2.36008	0.610238	0.648428	94.1104
2.39657	0.627489	0.660307	95.0299
2.63955	0.581797	0.609941	95.3858
2.64382	0.59559	0.628525	94.76
2.88295	0.528866	0.573467	92.2226
2.89019	0.550798	0.584362	94.2563
3.06981	0.501546	0.523804	95.7506
3.08603	0.517681	0.550337	94.0662
3.26775	0.471373	0.497918	94.6688
3.27928	0.472079	0.506123	93.2737
4.03115	0.424935	0.452243	93.9617
4.04046	0.376889	0.396469	95.0613
4.04309	0.452861	0.479631	94.4186
4.05614	0.411074	0.432004	95.1552
